# Supplementary material for: Feasibility of Training Clinical Officers in Point-of-Care Ultrasound for Pediatric Respiratory Diseases in Aweil, South Sudan
Source: PubMed Central journal article supplement (PMC6726960; doi:10.4269/ajtmh.18-0745), 2019-07-08
Supplement: tpmd180745.SD1.pdf [file tpmd180745.SD1.pdf]

## Supplemental Appendix – Training Methodology

### General information

- 2 participants per day, 2 days each participant

|             |       |       |       |       |       |       |
|-------------|-------|-------|-------|-------|-------|-------|
| Day         | 1     | 2     | 3     | 4     | 5     | 6     |
| Participant | 1 & 2 | 3 & 4 | 5 & 6 | 1 & 2 | 3 & 4 | 5 & 6 |

- Schedule each day – 6 hours/day
  - 8AM-9AM – didactic using powerpoints
  - 11AM-1PM – bedside scanning
  - 1PM-2PM lunch
  - 2PM-3PM – image review from AM and didactic review
  - 3PM-5PM – bedside scanning and image review at end
